# Supplementary material for: Rapid sequence induction: An international survey
Source: PubMed Central journal article supplement — Eur J Anaesthesiol. 2020 Mar 26;37(6):435–42. doi: 10.1097/EJA.0000000000001194 (PMC7259384; doi:10.1097/eja.0000000000001194), 2020-03-26

# Rapid sequence induction - RSI (questionnaire)

## Question 1

### Your official working position

| Answer Choices                         | Responses   |
|----------------------------------------|-------------|
| Anaesthesiologist (completed training) | 76.55% 1469 |
| Anaesthesiologist trainee              | 22.09% 424  |
| Anaesthesiologic Nurse                 | 0.47% 9     |
| Other (please specify)                 | 0.89% 17    |
| <b>Answered 1919</b>                   |             |
| <b>Skipped 2</b>                       |             |

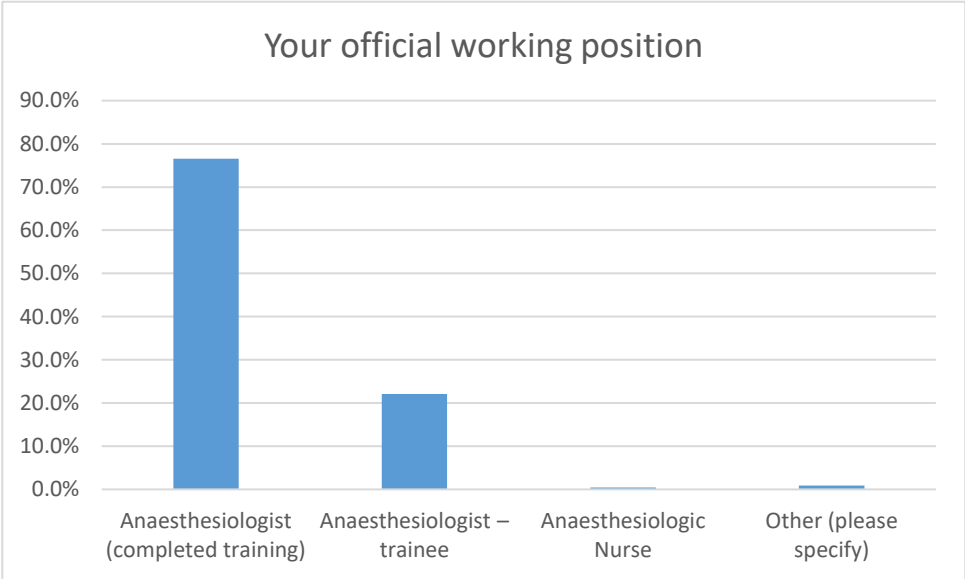

## Question 2

### Rapid sequence induction - RSI (questionnaire)

#### Your anaesthesiology practice is located?

| Answer Choices         | Responses | Answer Choices                   | Responses            |
|------------------------|-----------|----------------------------------|----------------------|
| Albania                | 0.58% 11  | Malta                            | 0.32% 6              |
| Andorra                | 0.00% 0   | Moldova                          | 0.16% 3              |
| Armenia                | 0.16% 3   | Monaco                           | 0.00% 0              |
| Austria                | 3.95% 75  | Montenegro                       | 0.00% 0              |
| Azerbaijan             | 0.11% 2   | Netherlands                      | 4.68% 89             |
| Belarus                | 0.11% 2   | North Macedonia                  | 0.47% 9              |
| Belgium                | 3.63% 69  | Norway                           | 1.32% 25             |
| Bosnia and Herzegovina | 0.63% 12  | Poland                           | 2.84% 54             |
| Bulgaria               | 0.84% 16  | Portugal                         | 4.63% 88             |
| Croatia                | 1.63% 31  | Romania                          | 4.11% 78             |
| Cyprus                 | 0.32% 6   | Russia                           | 1.79% 34             |
| Czech Republic         | 8.11% 154 | San Marino                       | 0.00% 0              |
| Denmark                | 0.58% 11  | Serbia                           | 0.53% 10             |
| Estonia                | 0.21% 4   | Slovakia                         | 1.79% 34             |
| Finland                | 0.37% 7   | Slovenia                         | 1.11% 21             |
| France                 | 1.84% 35  | Spain                            | 5.00% 95             |
| Georgia                | 0.21% 4   | Sweden                           | 2.11% 40             |
| Germany                | 9.00% 171 | Switzerland                      | 4.63% 88             |
| Greece                 | 2.53% 48  | Turkey                           | 1.32% 25             |
| Hungary                | 2.16% 41  | Ukraine                          | 1.11% 21             |
| Iceland                | 0.05% 1   | United Kingdom                   | 4.84% 92             |
| Ireland                | 0.53% 10  | Vatican City                     | 0.00% 0              |
| Italy                  | 2.37% 45  | Other (Australia and Oceania)    | 2.26% 43             |
| Israel                 | 0.74% 14  | Other (Africa)                   | 1.74% 33             |
| Kazakhstan             | 0.00% 0   | Other (Asia)                     | 5.74% 109            |
| Latvia                 | 0.68% 13  | Other (North America)            | 2.37% 45             |
| Liechtenstein          | 0.00% 0   | Other (South and Middle America) | 2.89% 55             |
| Lithuania              | 0.79% 15  |                                  | <b>Answered 1900</b> |
| Luxembourg             | 0.16% 3   |                                  | <b>Skipped 21</b>    |

## Question 3 and 14

| In what situations do You indicate RSI? (multiple choice question)                    |       |        |      |        |       |
|---------------------------------------------------------------------------------------|-------|--------|------|--------|-------|
| Answer Choices                                                                        | Adult |        | Paed |        | Total |
| 1. Acute abdomen                                                                      | 1546  | 88,55% | 1304 | 88,59% | 2850  |
| 2. Risk of regurgitation or aspiration (Hiatal hernia, GE-reflux, non-fasted patient) | 1651  | 94,56% | 1339 | 90,96% | 2990  |
| 3. Trauma patient (with less than 6 hours between last meal and injury)               | 1621  | 92,84% | 1305 | 88,65% | 2926  |
| Other (please specify)                                                                | 464   | 26,58% | 92   | 6,25%  | 556   |

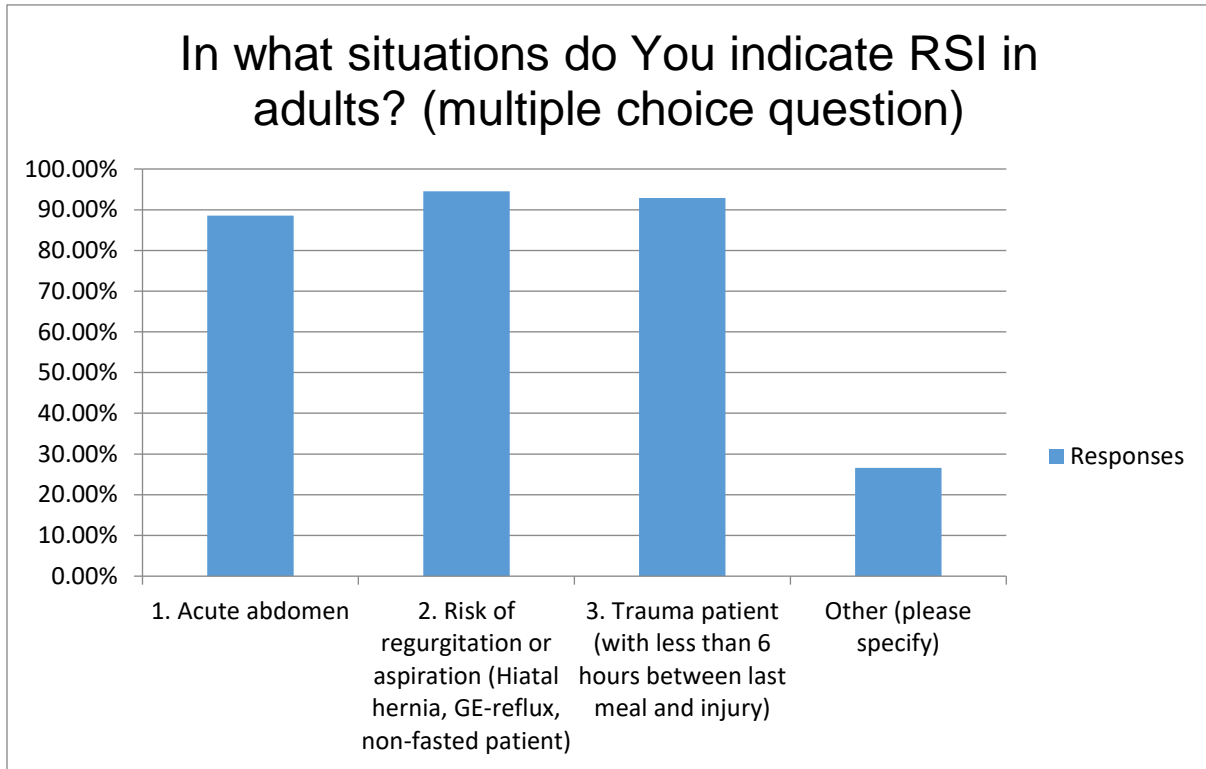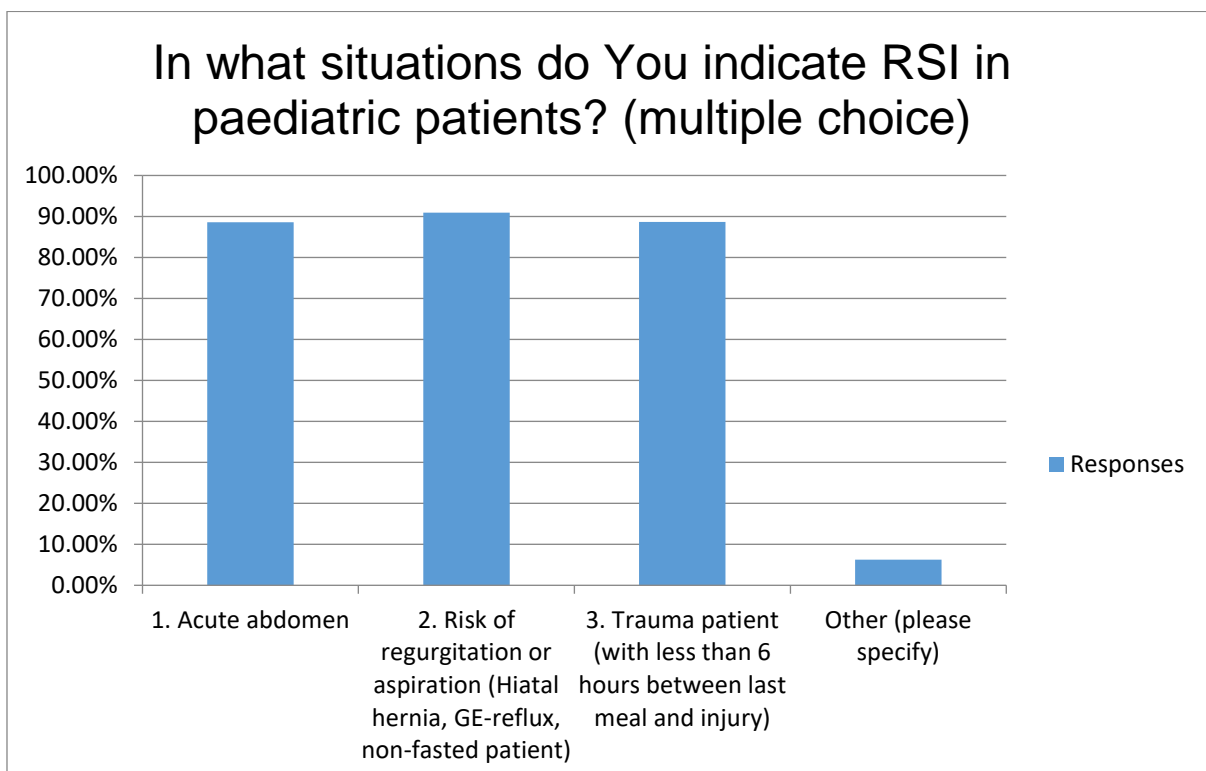

## Question 4 and 16

| What kind of patient's position do You prefer for Rapid-sequence induction? |       |        |      |        |       |
|-----------------------------------------------------------------------------|-------|--------|------|--------|-------|
| Answer Choices                                                              | Adult |        | Paed |        | Total |
| Trendelenburg position (head down by 15-30°)                                | 86    | 4,91%  | 74   | 5,11%  | 160   |
| Anti-Trendelenburg position (head up by 15-30°)                             | 1052  | 60,08% | 637  | 44,02% | 1689  |
| Neutral position – supine                                                   | 613   | 35,01% | 736  | 50,86% | 1349  |
| Totals                                                                      | 1751  |        | 1447 |        | 3198  |

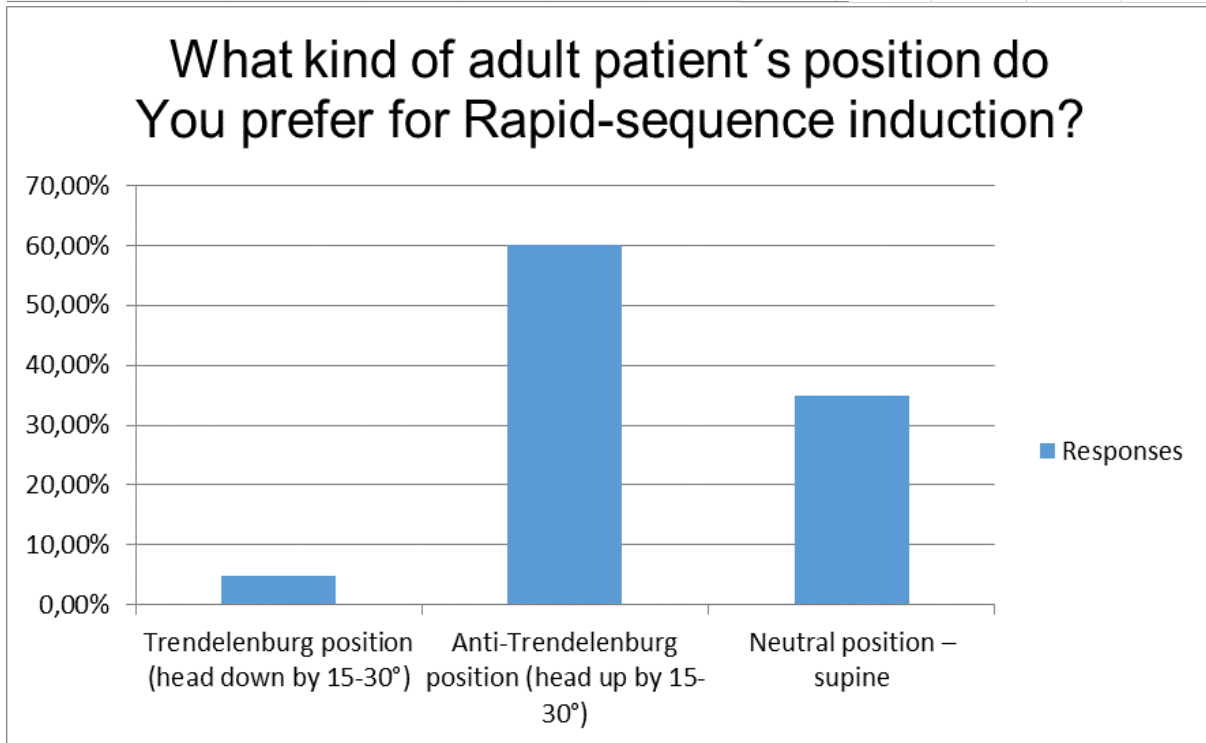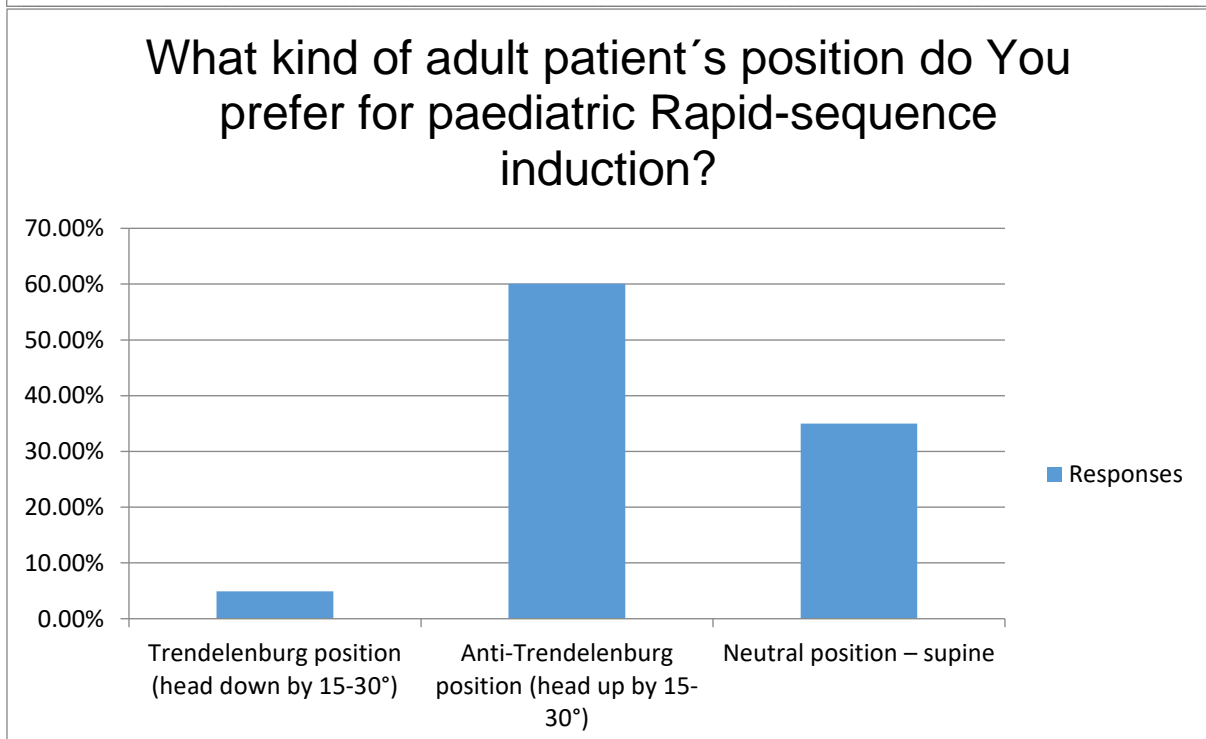

## Question 5

| What's Your gastric tube management for RSI in adults?                         |                |             |
|--------------------------------------------------------------------------------|----------------|-------------|
| Answer Choices                                                                 | Responses      |             |
| Gastric tube insertion before anaesthesia and left in place for anaesthesia in | 27,73%         | 485         |
| Gastric tube insertion before anaesthesia, removal before anaesthesia indu     | 20,81%         | 364         |
| Don't need gastric tube for RSI                                                | 38,25%         | 669         |
| Other (please specify)                                                         | 13,21%         | 231         |
|                                                                                | <b>Answers</b> | <b>1749</b> |
|                                                                                | <b>Skipped</b> | <b>172</b>  |

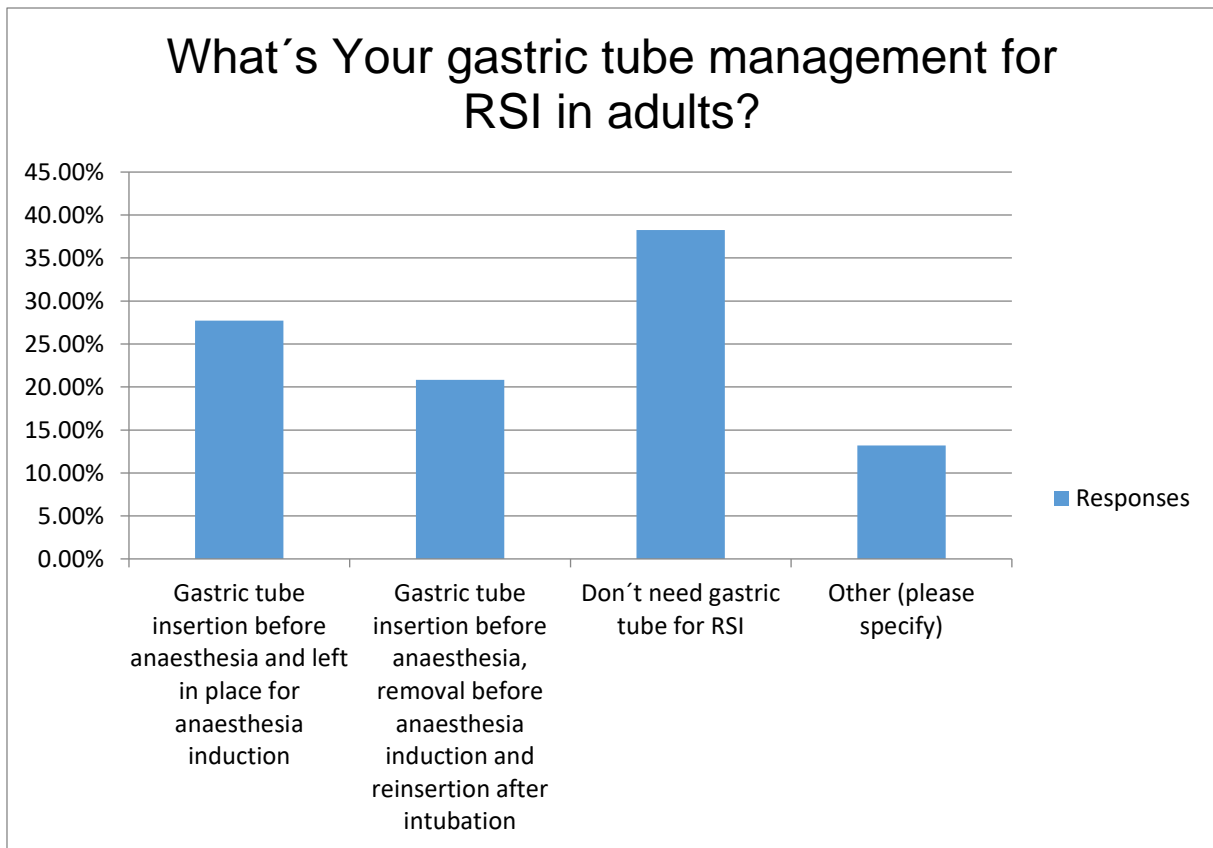

## Question 6 and 17

| Do You use Sellick manoeuvre in RSI?                                             |  | Adult |        | Paed |        | Total |
|----------------------------------------------------------------------------------|--|-------|--------|------|--------|-------|
| Answer Choices                                                                   |  |       |        |      |        |       |
| Yes, in all patients indicated for RSI                                           |  | 675   | 38,48% | 340  | 23,50% | 1015  |
| I perform Sellick manoeuvre only in specific groups of patients (e.g. GE-reflux) |  | 397   | 22,63% | 313  | 21,63% | 710   |
| I don't perform Sellick manoeuvre in RSI                                         |  | 656   | 37,40% | 784  | 54,18% | 1440  |
| Other                                                                            |  | 26    | 1,48%  | 10   | 0,69%  | 36    |
| Totals                                                                           |  | 1754  |        | 1447 |        | 3201  |

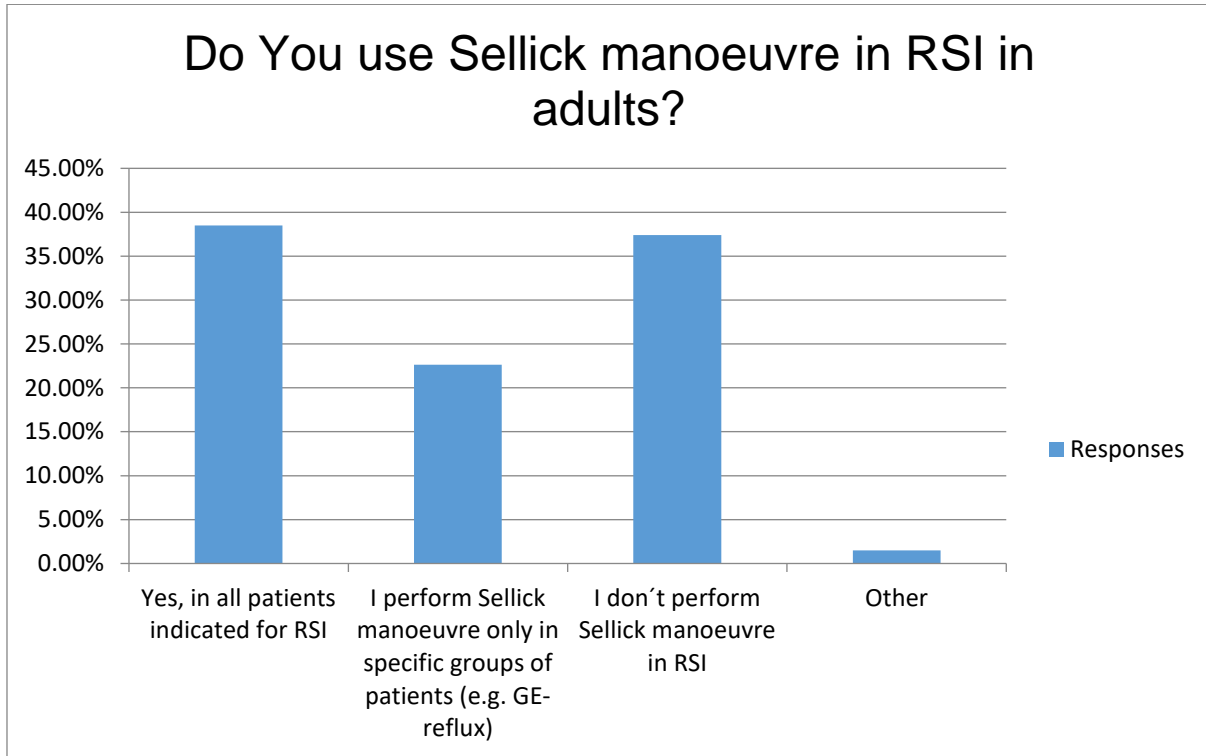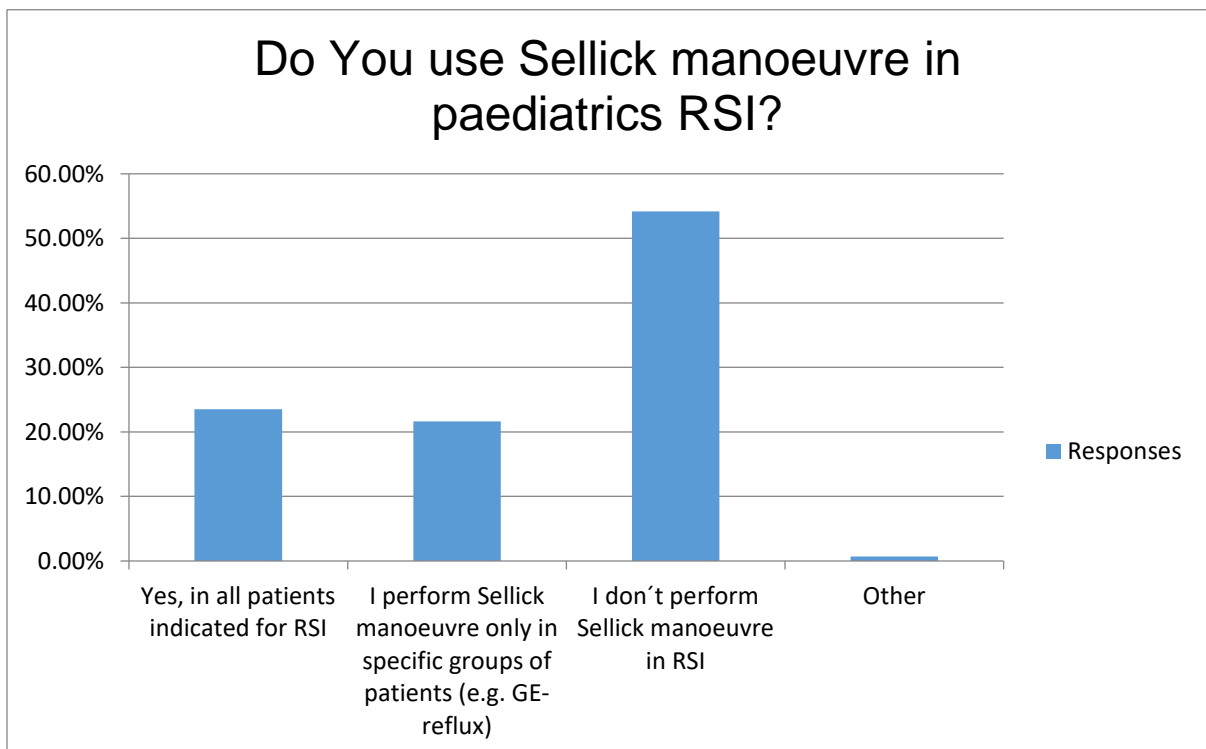

## Question 7 and 18

| How do You preoxygenate the patient before RSI?    |       |        |      |        |       |
|----------------------------------------------------|-------|--------|------|--------|-------|
| Answer Choices                                     | Adult |        | Paed |        | Total |
| 100% O2 with tight-fitting face mask for 3 minutes | 1081  | 61,70% | 817  | 56,62% | 1898  |
| 100% O2 with tight-fitting face mask for 5 minutes | 348   | 19,86% | 275  | 19,06% | 623   |
| 80% O2 with tight-fitting face mask for 3 minutes  | 72    | 4,11%  | 104  | 7,21%  | 176   |
| 80% O2 with tight-fitting face mask for 5 minutes  | 38    | 2,17%  | 33   | 2,29%  | 71    |
| I don't routinely preoxygenate patients during RSI | 27    | 1,54%  | 61   | 4,23%  | 88    |
| Other                                              | 186   | 10,62% | 153  | 10,60% | 339   |
| Totals                                             | 1752  |        | 1443 |        | 3195  |

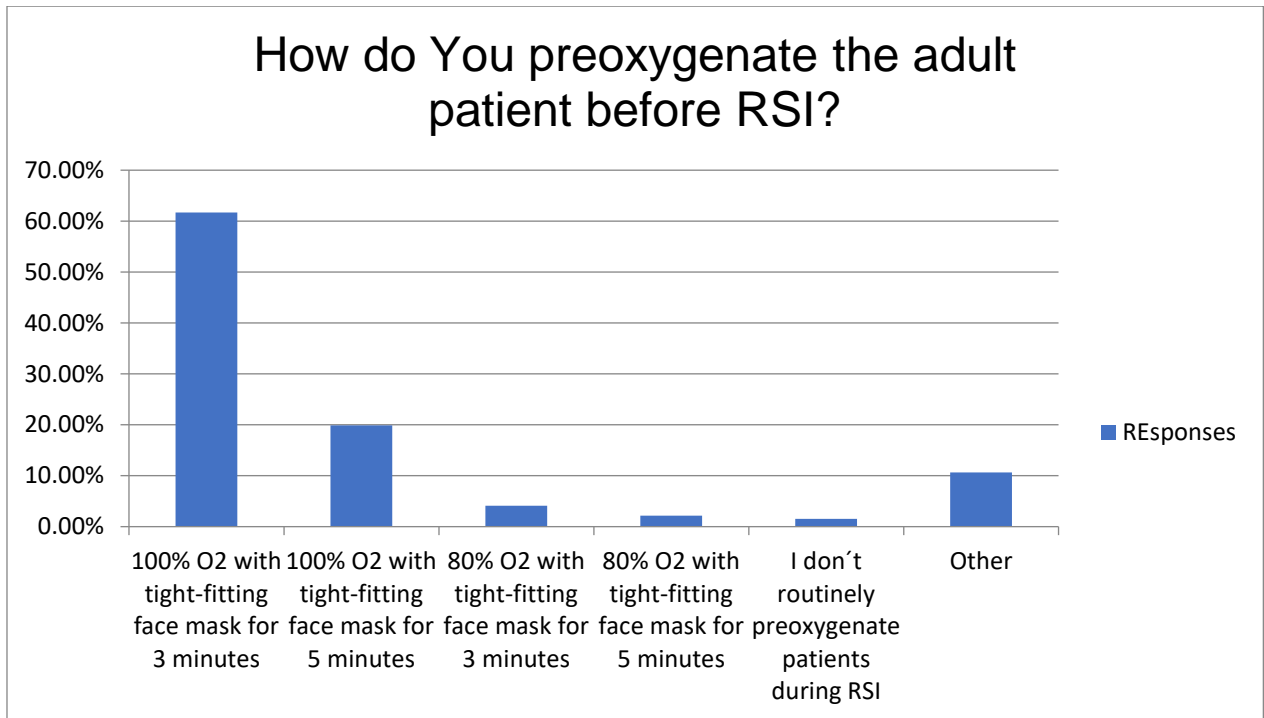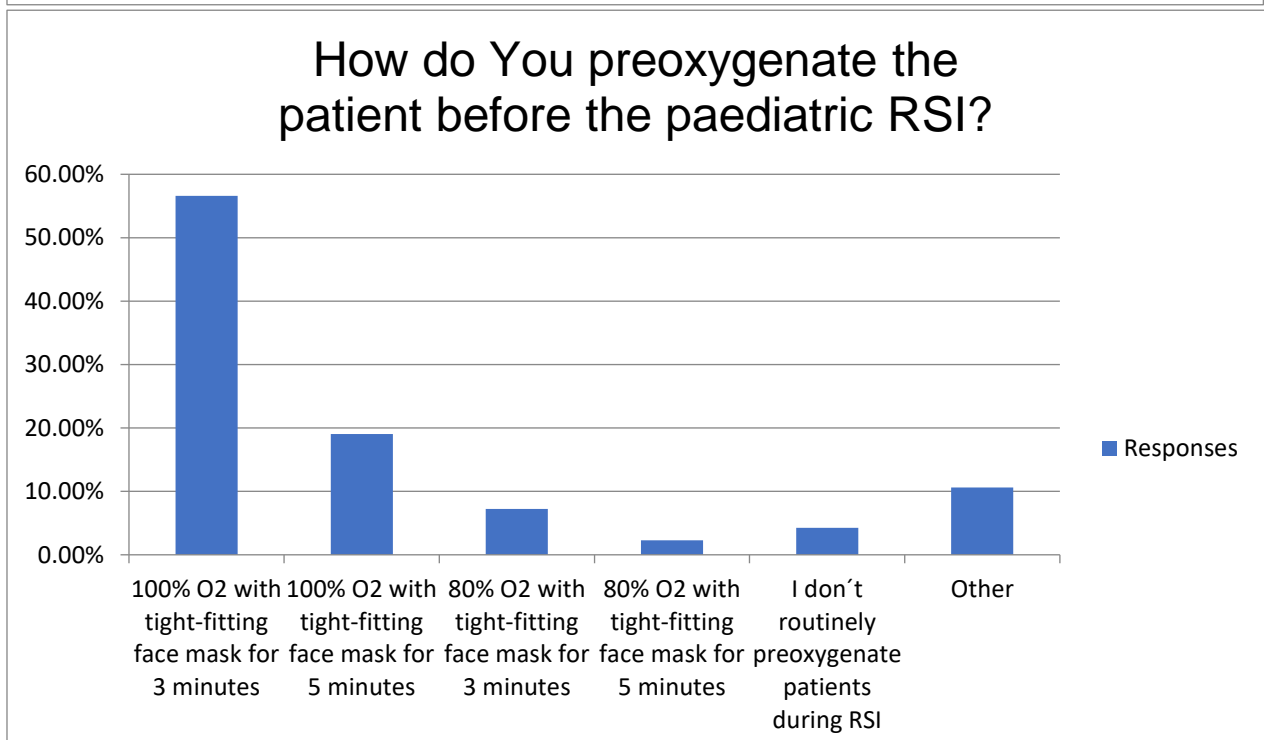

## Question 8 and 19

| Do You use opioids for anaesthesia induction during RSI? |       |        |      |        |       |
|----------------------------------------------------------|-------|--------|------|--------|-------|
| Answer Choices                                           | Adult |        | Paed |        | Total |
| Yes, in all patients                                     | 1156  | 65,94% | 792  | 54,85% | 1948  |
| In minority of patients e.g. with severe pain            | 344   | 19,62% | 371  | 25,69% | 715   |
| No, never during RSI                                     | 163   | 9,30%  | 250  | 17,31% | 413   |
| Other                                                    | 90    | 5,13%  | 31   | 2,15%  | 121   |
| Totals                                                   | 1753  |        | 1444 |        | 3197  |

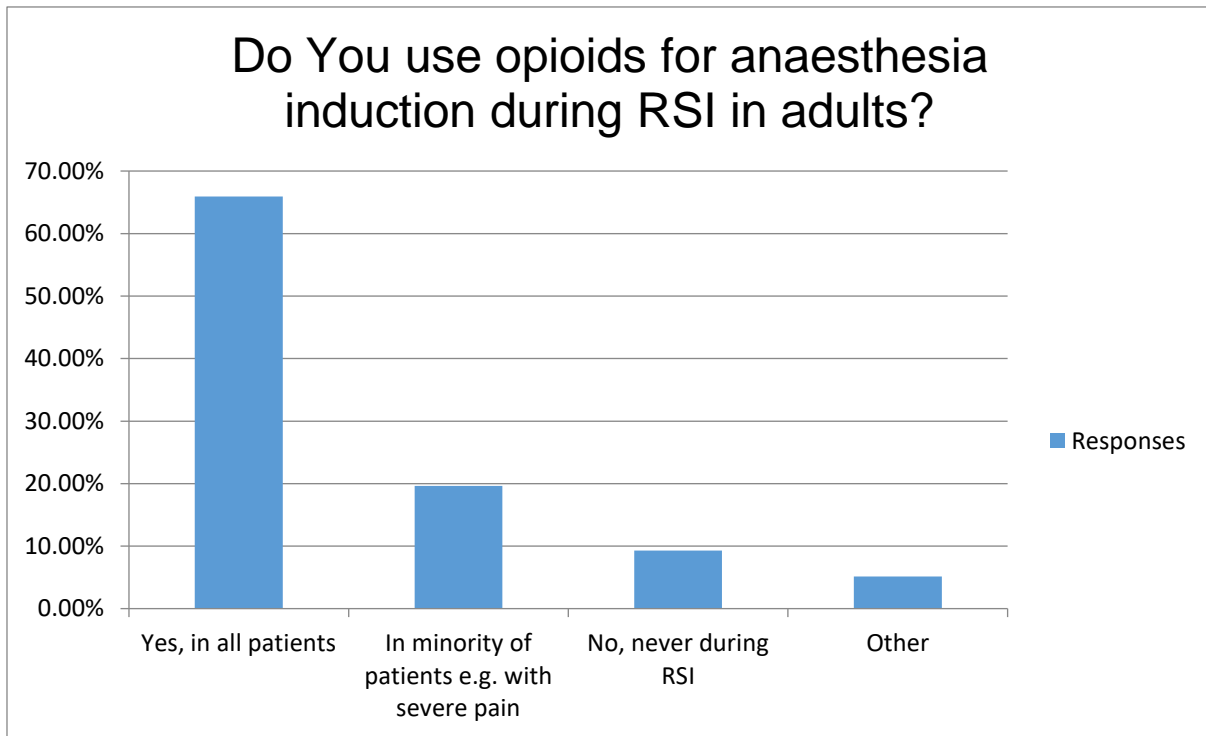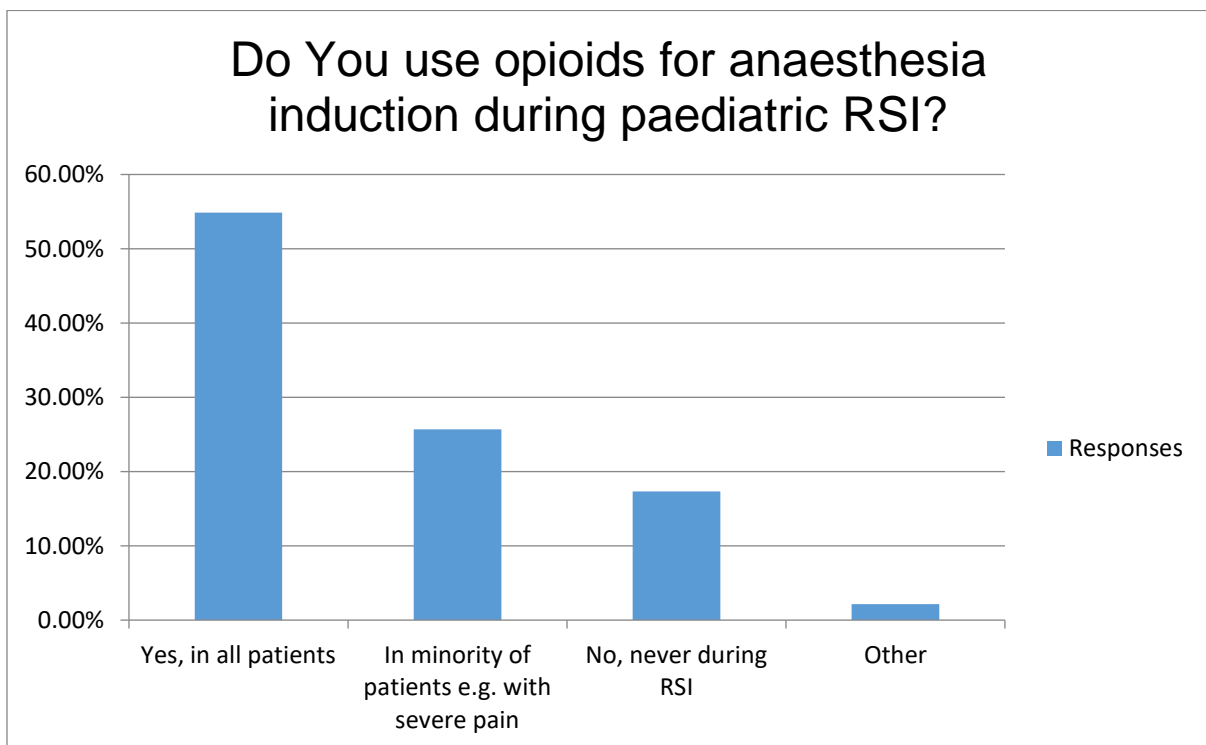



## Question 9 and 21

| What kind of induction agent do You use for haemodynamically unstable patient for RSI? (choose only one option for 1st, 2nd and 3rd choice) |          |        |       |        |      |                        |        |      |        |       |           |        |     |        |      |
|---------------------------------------------------------------------------------------------------------------------------------------------|----------|--------|-------|--------|------|------------------------|--------|------|--------|-------|-----------|--------|-----|--------|------|
| Answer Choices                                                                                                                              | Propofol |        |       |        |      | Thiopental/Thiopentone |        |      |        |       | Etomidate |        |     |        |      |
|                                                                                                                                             | Adult    | Paed   | Total | Adult  | Paed | Total                  | Adult  | Paed | Total  | Adult | Paed      | Total  |     |        |      |
| Yes (1st choice)                                                                                                                            | 463      | 29,45% | 348   | 29,67% | 811  | 107                    | 8,36%  | 84   | 8,47%  | 191   | 560       | 37,86% | 166 | 16,75% | 726  |
| Yes (2nd choice)                                                                                                                            | 489      | 31,11% | 342   | 29,16% | 831  | 242                    | 18,91% | 169  | 17,04% | 411   | 359       | 24,27% | 191 | 19,27% | 550  |
| Yes (3rd choice)                                                                                                                            | 385      | 24,49% | 244   | 20,80% | 629  | 263                    | 20,55% | 168  | 16,94% | 431   | 173       | 11,70% | 86  | 8,68%  | 259  |
| No                                                                                                                                          | 235      | 14,95% | 239   | 20,38% | 474  | 668                    | 52,19% | 571  | 57,56% | 1239  | 387       | 26,17% | 548 | 55,30% | 935  |
| Totals                                                                                                                                      | 1572     |        | 1173  |        | 2745 | 1280                   |        | 992  |        | 2272  | 1479      |        | 991 |        | 2470 |

| What kind of induction agent do You use for haemodynamically unstable patient for RSI? (choose only one option for 1st, 2nd and 3rd choice) |          |        |       |        |                                 |       |        |      |                                       |       |      |        |      |        |      |
|---------------------------------------------------------------------------------------------------------------------------------------------|----------|--------|-------|--------|---------------------------------|-------|--------|------|---------------------------------------|-------|------|--------|------|--------|------|
| Answer Choices                                                                                                                              | Ketamine |        |       |        | Benzodiazepine – e.g. midazolam |       |        |      | Inhalation induction with sevoflurane |       |      |        |      |        |      |
|                                                                                                                                             | Adult    | Paed   | Total | Adult  | Paed                            | Total | Adult  | Paed | Total                                 | Adult | Paed | Total  |      |        |      |
| Yes (1st choice)                                                                                                                            | 664      | 42,29% | 748   | 58,44% | 1412                            | 158   | 12,11% | 136  | 13,19%                                | 294   | 20   | 1,64%  | 104  | 9,94%  | 124  |
| Yes (2nd choice)                                                                                                                            | 444      | 28,28% | 267   | 20,86% | 711                             | 200   | 15,33% | 206  | 19,98%                                | 406   | 27   | 2,22%  | 146  | 13,96% | 173  |
| Yes (3rd choice)                                                                                                                            | 255      | 16,24% | 84    | 6,56%  | 339                             | 247   | 18,93% | 135  | 13,09%                                | 382   | 72   | 5,92%  | 190  | 18,16% | 262  |
| No                                                                                                                                          | 207      | 13,18% | 181   | 14,14% | 388                             | 700   | 53,64% | 554  | 53,73%                                | 1254  | 1098 | 90,22% | 606  | 57,93% | 1704 |
| Totals                                                                                                                                      | 1570     |        | 1280  |        | 2850                            | 1305  |        | 1031 |                                       | 2336  | 1217 |        | 1046 |        | 2263 |

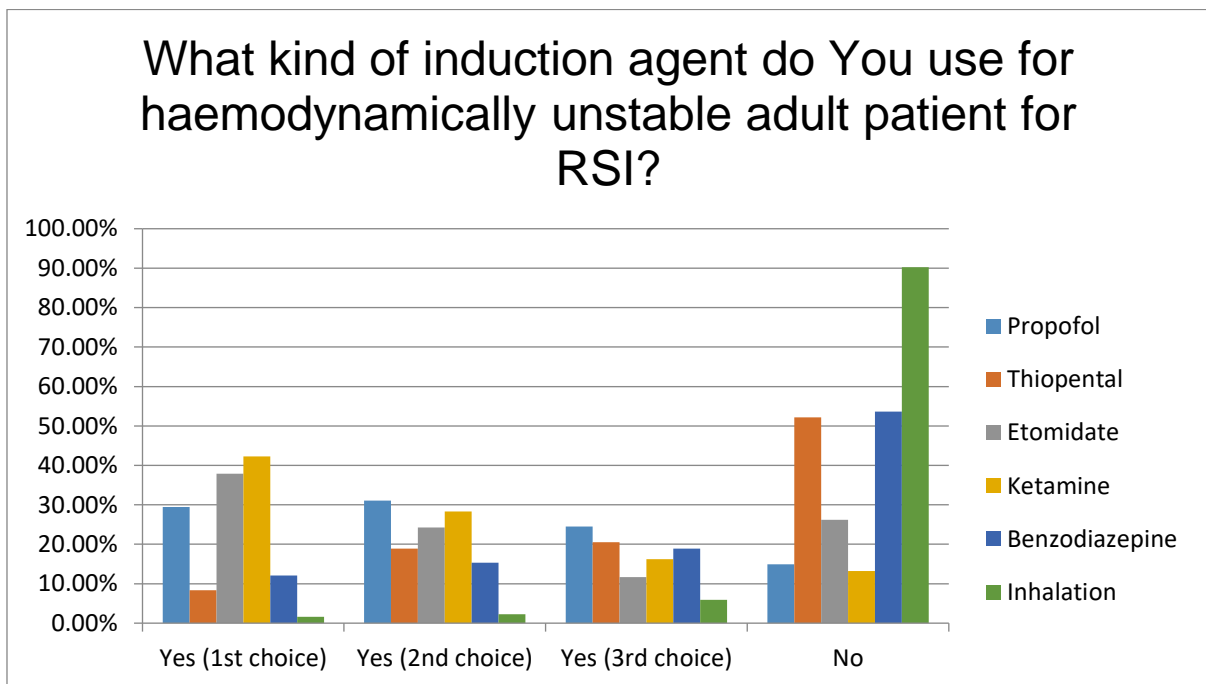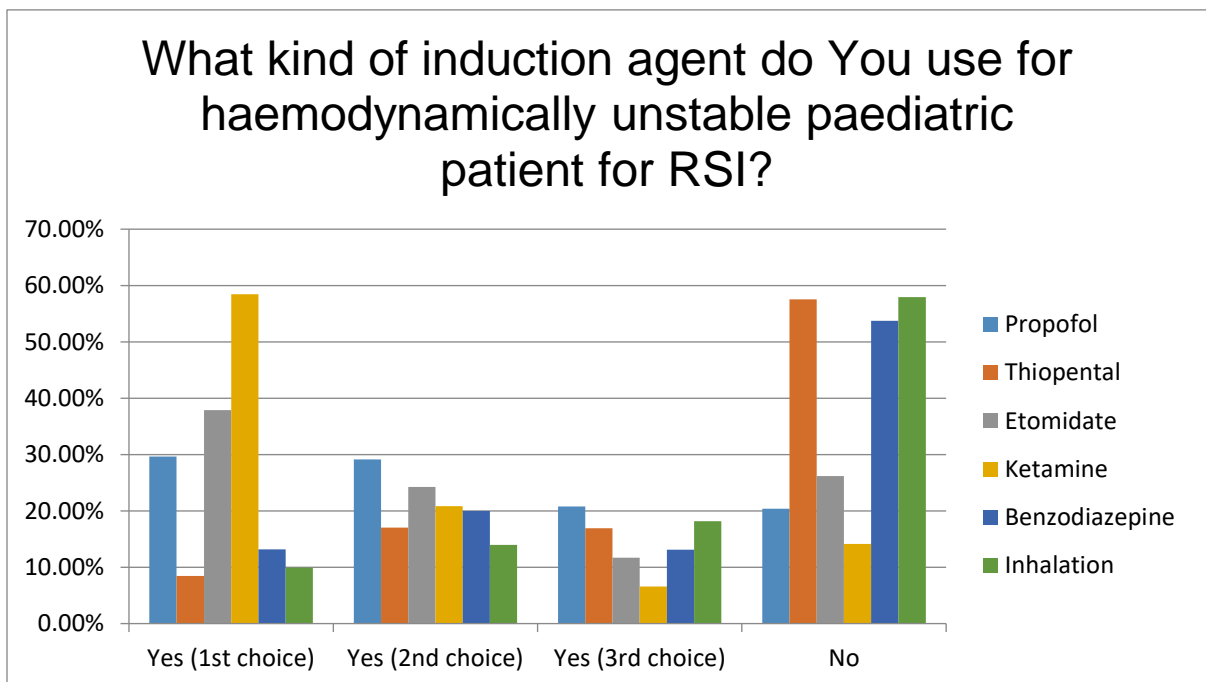

## Question 10 and 20

| What kind of induction agent do You use for haemodynamically stable patient for RSI? (choose only one option for 1st, 2nd and 3rd choice) |          |        |       |        |      |                        |        |      |        |       |           |        |     |        |      |
|-------------------------------------------------------------------------------------------------------------------------------------------|----------|--------|-------|--------|------|------------------------|--------|------|--------|-------|-----------|--------|-----|--------|------|
| Answer Choices                                                                                                                            | Propofol |        |       |        |      | Thiopental/Thiopentone |        |      |        |       | Etomidate |        |     |        |      |
|                                                                                                                                           | Adult    | Paed   | Total | Adult  | Paed | Total                  | Adult  | Paed | Total  | Adult | Paed      | Total  |     |        |      |
| Yes (1st choice)                                                                                                                          | 1571     | 90,60% | 1153  | 82,77% | 2724 | 158                    | 11,24% | 136  | 12,47% | 294   | 31        | 2,38%  | 20  | 2,15%  | 51   |
| Yes (2nd choice)                                                                                                                          | 136      | 7,84%  | 183   | 13,14% | 319  | 543                    | 38,62% | 336  | 30,80% | 879   | 299       | 22,98% | 77  | 8,29%  | 376  |
| Yes (3rd choice)                                                                                                                          | 18       | 1,04%  | 30    | 2,15%  | 48   | 161                    | 11,45% | 108  | 9,90%  | 269   | 257       | 19,75% | 107 | 11,52% | 364  |
| No                                                                                                                                        | 9        | 0,52%  | 27    | 1,94%  | 36   | 544                    | 38,69% | 511  | 46,84% | 1055  | 714       | 54,88% | 725 | 78,04% | 1439 |
| Totals                                                                                                                                    | 1734     |        | 1393  |        | 3127 | 1406                   |        | 1091 |        | 2497  | 1301      |        | 929 |        | 2230 |

| What kind of induction agent do You use for haemodynamically stable patient for RSI? (choose only one option for 1st, 2nd and 3rd choice) |          |        |       |                                 |        |       |                                       |        |       |        |      |  |  |
|-------------------------------------------------------------------------------------------------------------------------------------------|----------|--------|-------|---------------------------------|--------|-------|---------------------------------------|--------|-------|--------|------|--|--|
| Answer Choices                                                                                                                            | Ketamine |        |       | Benzodiazepine – e.g. midazolam |        |       | Inhalation induction with sevoflurane |        |       |        |      |  |  |
|                                                                                                                                           | Adult    | Paed   | Total | Adult                           | Paed   | Total | Adult                                 | Paed   | Total |        |      |  |  |
| Yes (1st choice)                                                                                                                          | 48       | 3,81%  | 145   | 49                              | 3,96%  | 86    | 23                                    | 1,94%  | 132   | 12,00% | 155  |  |  |
| Yes (2nd choice)                                                                                                                          | 249      | 19,75% | 585   | 176                             | 14,23% | 307   | 49                                    | 4,13%  | 190   | 17,27% | 239  |  |  |
| Yes (3rd choice)                                                                                                                          | 311      | 24,66% | 576   | 218                             | 17,62% | 377   | 71                                    | 5,98%  | 230   | 20,91% | 301  |  |  |
| No                                                                                                                                        | 653      | 51,78% | 1075  | 794                             | 64,19% | 1454  | 1044                                  | 87,95% | 548   | 49,82% | 1592 |  |  |
| Totals                                                                                                                                    | 1261     |        | 2381  | 1237                            |        | 2224  | 1187                                  |        | 1100  |        | 2287 |  |  |

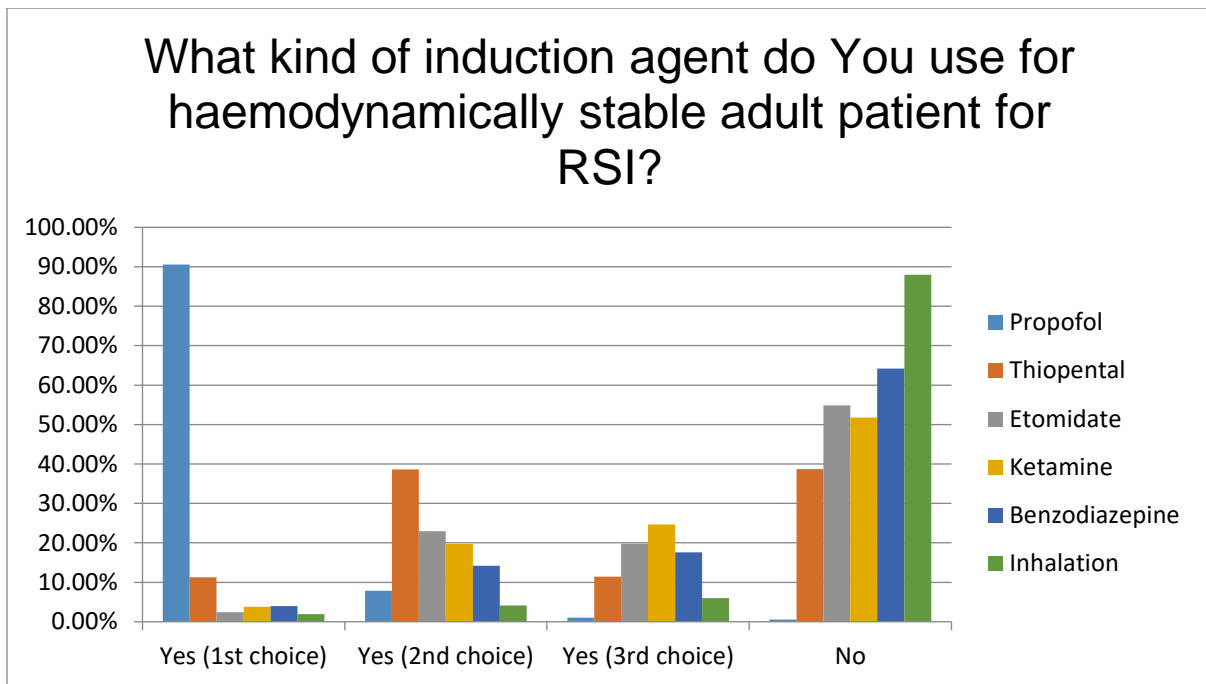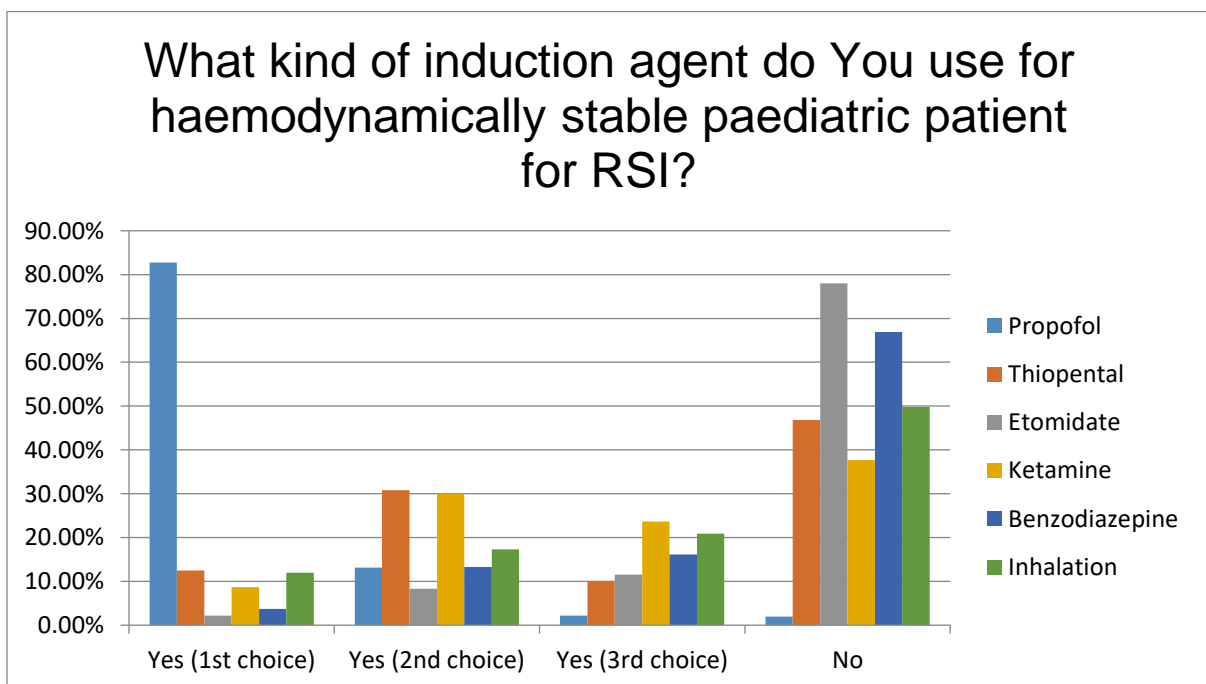

## Question 11 and 22

| What kind of muscle relaxant do You prefer for anaesthesia induction during RSI?(choose only one option for 1st, 2nd and 3rd choice) |               |        |       |        |      |            |        |      |        |       |               |        |     |        |      |
|--------------------------------------------------------------------------------------------------------------------------------------|---------------|--------|-------|--------|------|------------|--------|------|--------|-------|---------------|--------|-----|--------|------|
| Answer Choices                                                                                                                       | Suxamethonium |        |       |        |      | Rocuronium |        |      |        |       | Cisatracurium |        |     |        |      |
|                                                                                                                                      | Adult         | Paed   | Total | Adult  | Paed | Total      | Adult  | Paed | Total  | Adult | Paed          | Total  |     |        |      |
| Yes (1st choice)                                                                                                                     | 932           | 56,04% | 620   | 48,25% | 1552 | 836        | 49,32% | 741  | 54,69% | 1577  | 9             | 0,74%  | 13  | 1,36%  | 22   |
| Yes (2nd choice)                                                                                                                     | 592           | 35,60% | 415   | 32,30% | 1007 | 785        | 46,31% | 508  | 37,49% | 1293  | 64            | 5,25%  | 69  | 7,23%  | 133  |
| Yes (3rd choice)                                                                                                                     | 36            | 2,16%  | 63    | 4,90%  | 99   | 31         | 1,83%  | 53   | 3,91%  | 84    | 147           | 12,05% | 100 | 10,48% | 247  |
| No                                                                                                                                   | 103           | 6,19%  | 187   | 14,55% | 290  | 43         | 2,54%  | 53   | 3,91%  | 96    | 1000          | 81,97% | 772 | 80,92% | 1772 |
| Totals                                                                                                                               | 1663          |        | 1285  |        | 2948 | 1695       |        | 1355 |        | 3050  | 1220          |        | 954 |        | 2174 |

| What kind of muscle relaxant do You prefer for anaesthesia induction during RSI?(choose only one option for 1st, 2nd and 3rd choice) |            |        |       |        |      |                                               |        |      |        |       |      |       |       |      |       |
|--------------------------------------------------------------------------------------------------------------------------------------|------------|--------|-------|--------|------|-----------------------------------------------|--------|------|--------|-------|------|-------|-------|------|-------|
| Answer Choices                                                                                                                       | Atracurium |        |       |        |      | I prefer to intubate without muscle paralysis |        |      |        |       |      |       |       |      |       |
|                                                                                                                                      | Adult      | Paed   | Total | Adult  | Paed | Total                                         | Adult  | Paed | Total  | Adult | Paed | Total | Adult | Paed | Total |
| Yes (1st choice)                                                                                                                     | 15         | 1,20%  | 28    | 2,89%  | 43   | 20                                            | 1,60%  | 83   | 8,03%  | 103   |      |       |       |      |       |
| Yes (2nd choice)                                                                                                                     | 65         | 5,18%  | 73    | 7,54%  | 138  | 43                                            | 3,44%  | 105  | 10,15% | 148   |      |       |       |      |       |
| Yes (3rd choice)                                                                                                                     | 176        | 14,04% | 115   | 11,88% | 291  | 142                                           | 11,37% | 190  | 18,38% | 332   |      |       |       |      |       |
| No                                                                                                                                   | 998        | 79,59% | 752   | 77,69% | 1750 | 1044                                          | 83,59% | 656  | 63,44% | 1700  |      |       |       |      |       |
| Totals                                                                                                                               | 1254       |        | 968   |        | 2222 | 1249                                          |        | 1034 |        | 2283  |      |       |       |      |       |

What kind of muscle relaxant do You prefer for anaesthesia induction during adult RSI?(choose only one option for 1st, 2nd and 3rd choice)

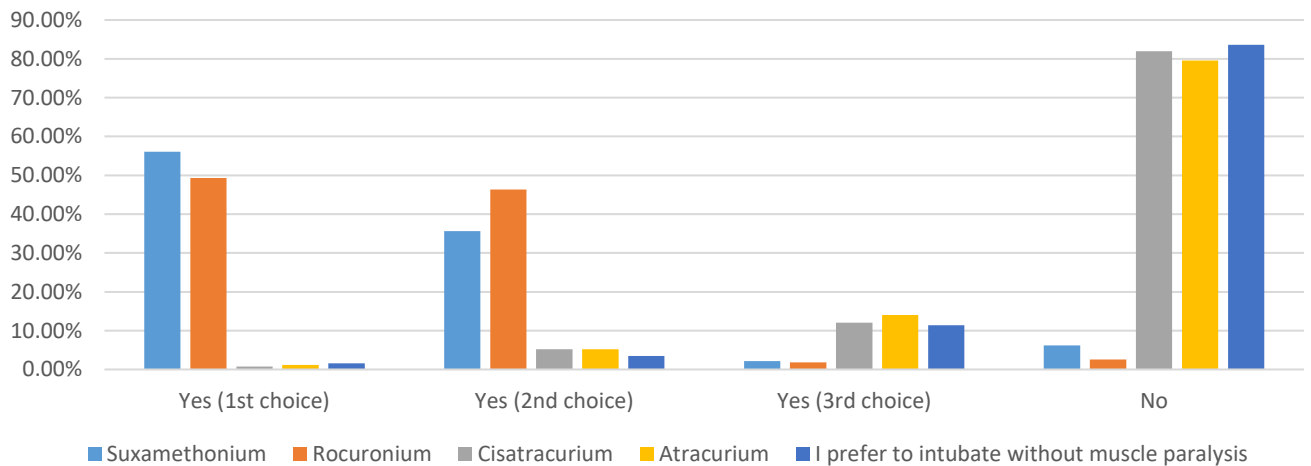

What kind of muscle relaxant do You prefer for anaesthesia induction during paediatric RSI?(choose only one option for 1st, 2nd and 3rd choice)

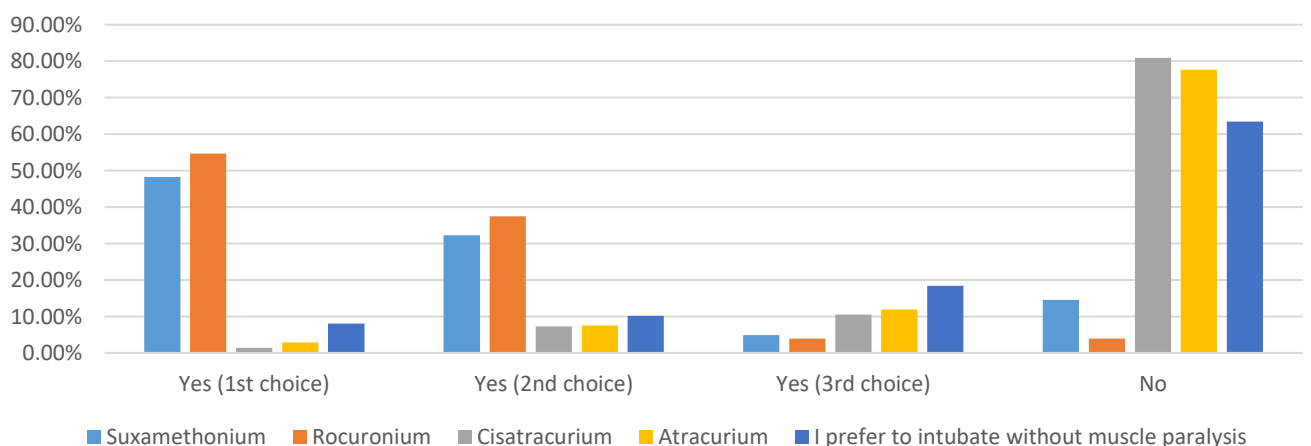

## Question 12 and 23

| Do You ventilate the patient via face mask before anaesthesia induction (before first intubation attempt)? |       |        |      |        |       |
|------------------------------------------------------------------------------------------------------------|-------|--------|------|--------|-------|
| Answer Choices                                                                                             | Adult |        | Paed |        | Total |
| Yes, in all patients                                                                                       | 65    | 3,71%  | 246  | 17,07% | 311   |
| Yes, in high risk patients, with limited inspiratory pressure (<12cm H20)                                  | 622   | 35,48% | 517  | 35,88% | 1139  |
| No, manual ventilation is contraindicated in RSI                                                           | 1003  | 57,22% | 597  | 41,43% | 1600  |
| Not decided                                                                                                | 63    | 3,59%  | 81   | 5,62%  | 144   |
| Totals                                                                                                     | 1753  |        | 1441 |        | 3194  |

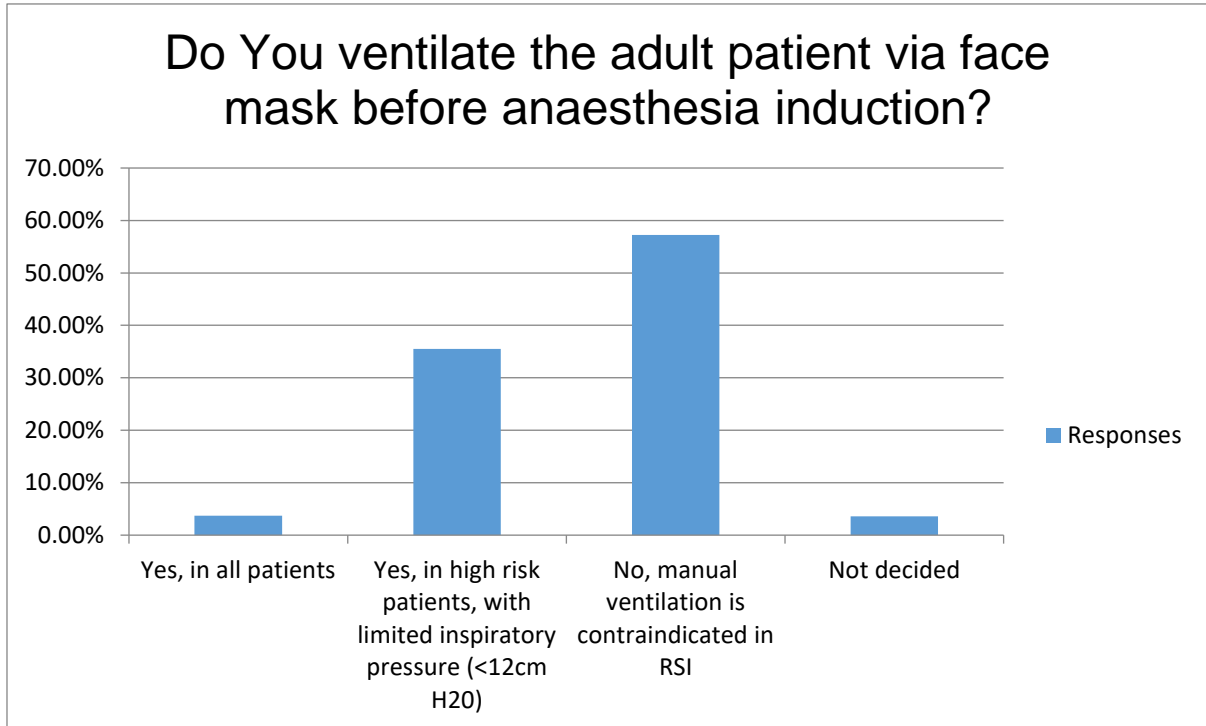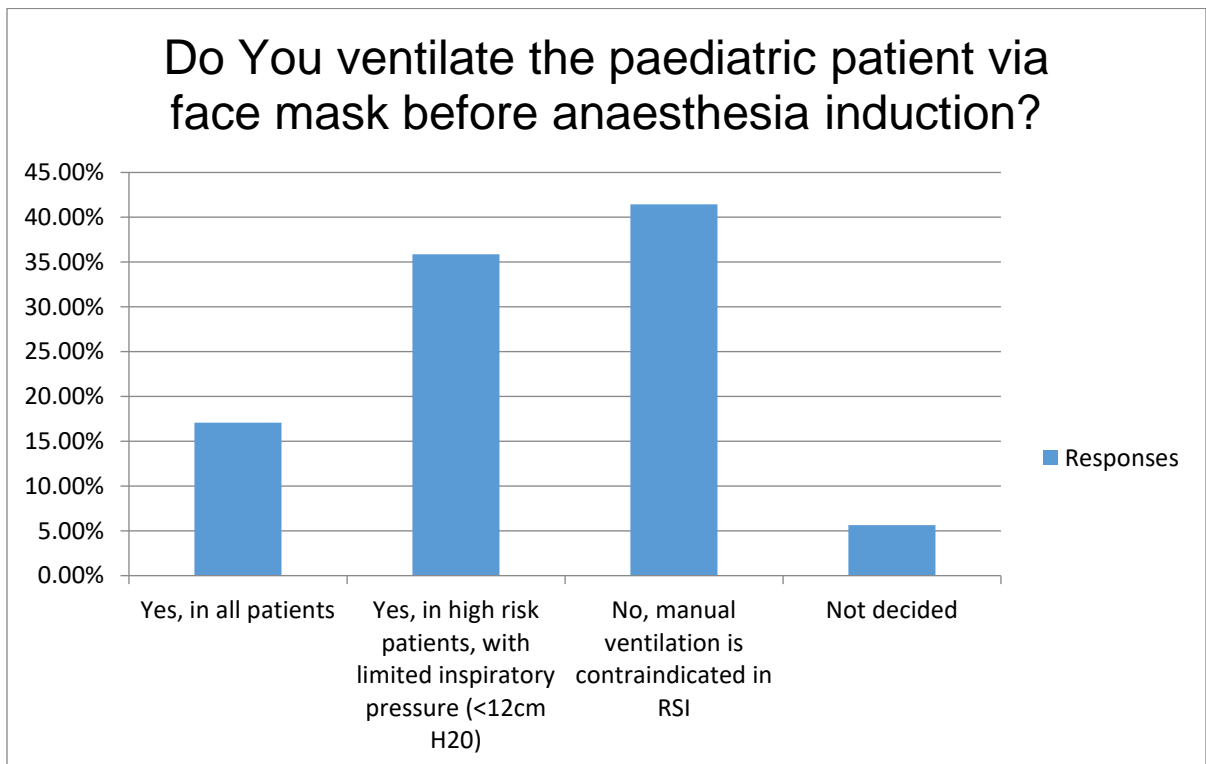

## Question 13 and 24

| Do You monitor the onset of neuromuscular blockade before intubation attempt? |       |        |      |        |       |
|-------------------------------------------------------------------------------|-------|--------|------|--------|-------|
| Answer Choices                                                                | Adult |        | Paed |        | Total |
| Yes, in all patients                                                          | 244   | 13,96% | 162  | 11,23% | 406   |
| Yes, sometimes                                                                | 575   | 32,89% | 413  | 28,64% | 988   |
| No, it is not needed                                                          | 580   | 33,18% | 536  | 37,17% | 1116  |
| No, I don't have monitor available                                            | 349   | 19,97% | 331  | 22,95% | 680   |
| Totals                                                                        | 1748  |        | 1442 |        | 3190  |

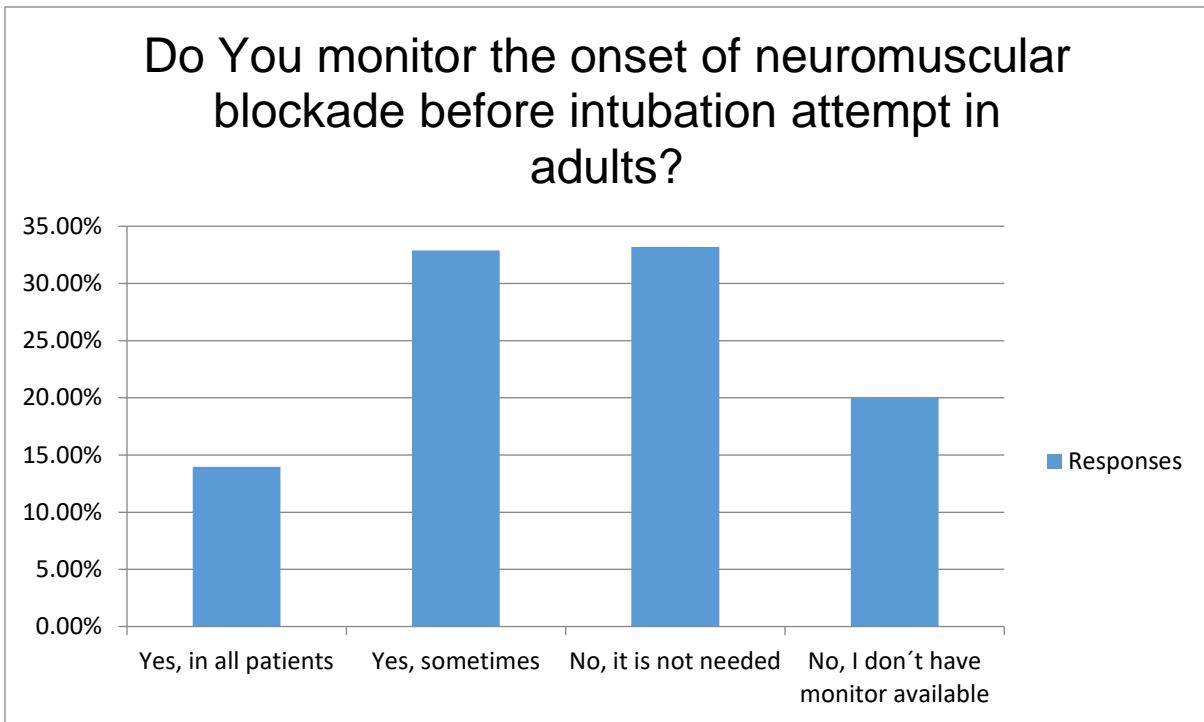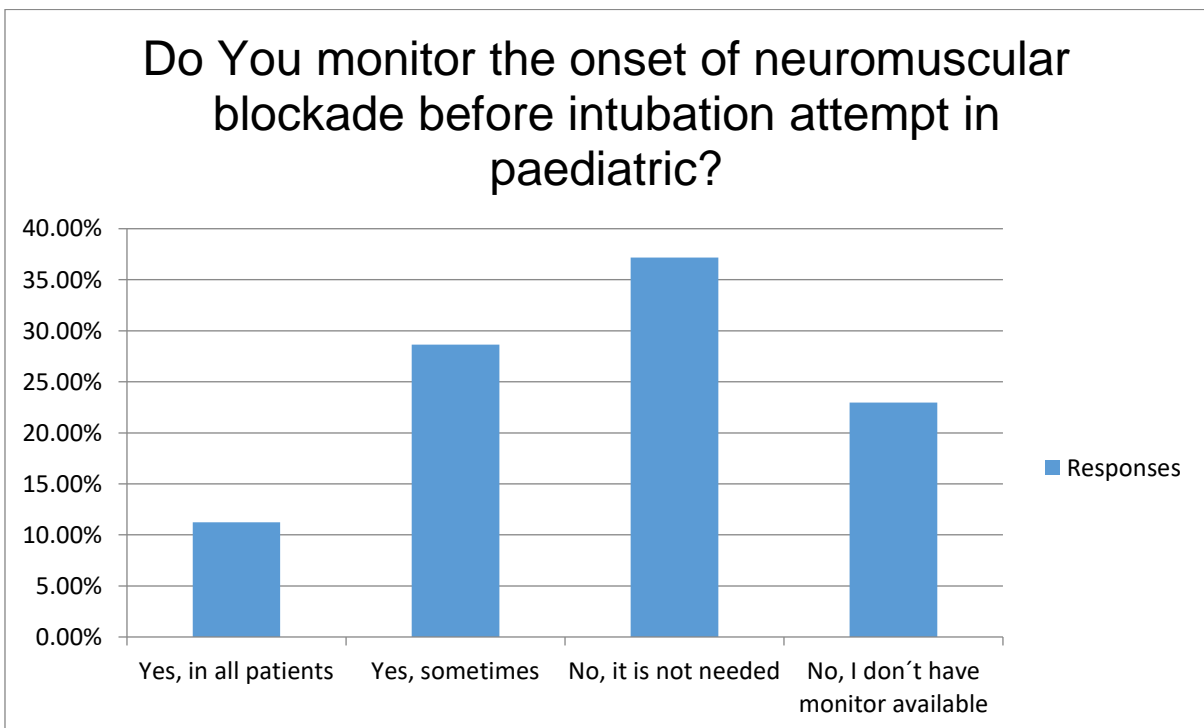

## Question 15

| Do you perform RSI in younger children with risk of regurgitation or aspiration?         |                |             |
|------------------------------------------------------------------------------------------|----------------|-------------|
| Answer Choices                                                                           | Responses      |             |
| I do in Newborns                                                                         | 5,31%          | 76          |
| I do in Toddlers                                                                         | 10,29%         | 147         |
| I do in Newborns and Toddlers                                                            | 30,65%         | 438         |
| I do only in older children                                                              | 44,08%         | 630         |
| I don't perform RSI in paediatric patients ( I think it is not indicated due to low risk | 9,66%          | 138         |
|                                                                                          | <b>Answers</b> | <b>1429</b> |
|                                                                                          | <b>Skipped</b> | <b>492</b>  |

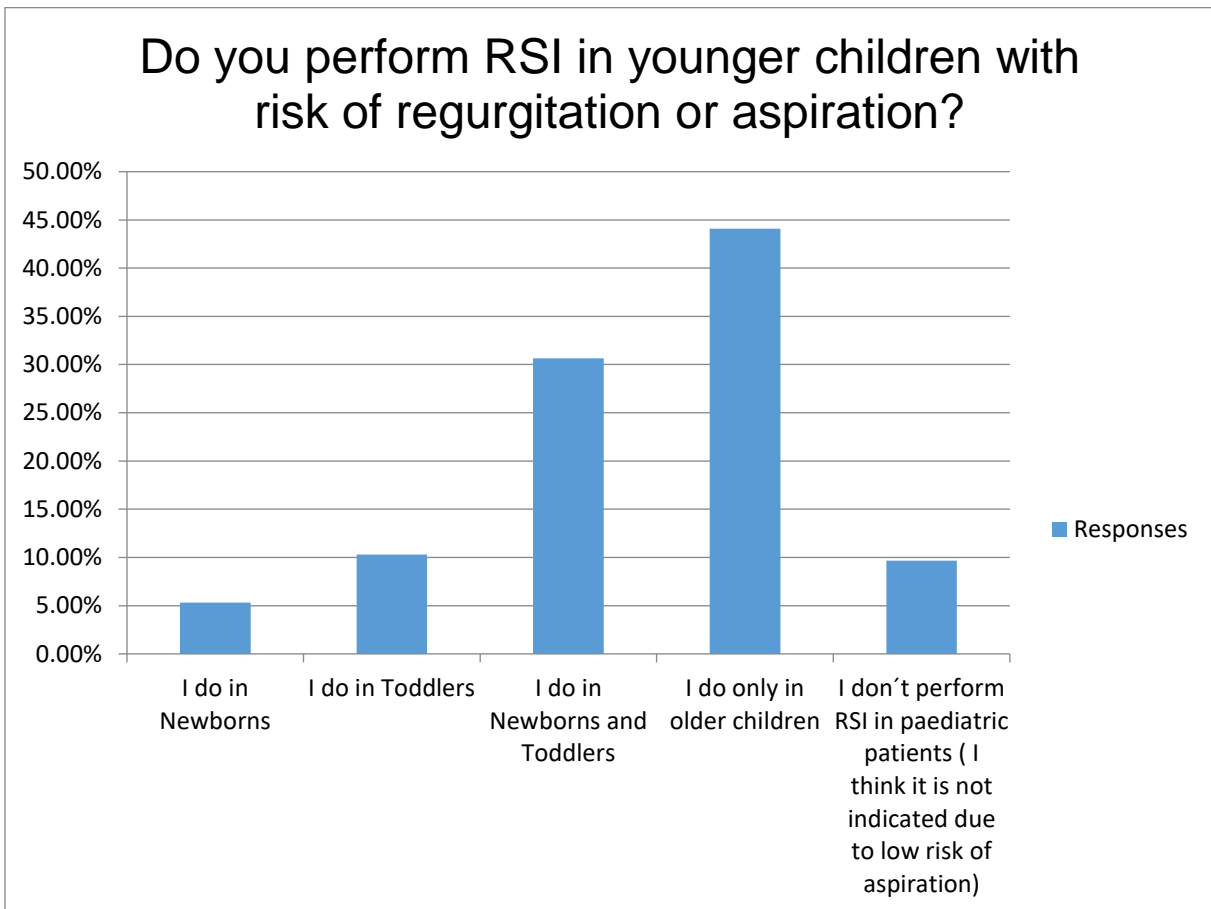

## Question 25

| Do You intubate the peadiatric patients indicated for RSI with cuffed tracheal tube? |                 |             |
|--------------------------------------------------------------------------------------|-----------------|-------------|
| Answer Choices                                                                       | Responses       |             |
| Yes, all of them                                                                     | 40,82%          | 585         |
| Yes, except neonates                                                                 | 30,57%          | 438         |
| Yes, except neonates and toddlers                                                    | 16,25%          | 233         |
| Yes, only older children (over 8 years)                                              | 10,11%          | 145         |
| No                                                                                   | 2,68%           | 32          |
|                                                                                      | <b>Answered</b> | <b>1433</b> |
|                                                                                      | <b>Skipped</b>  | <b>488</b>  |

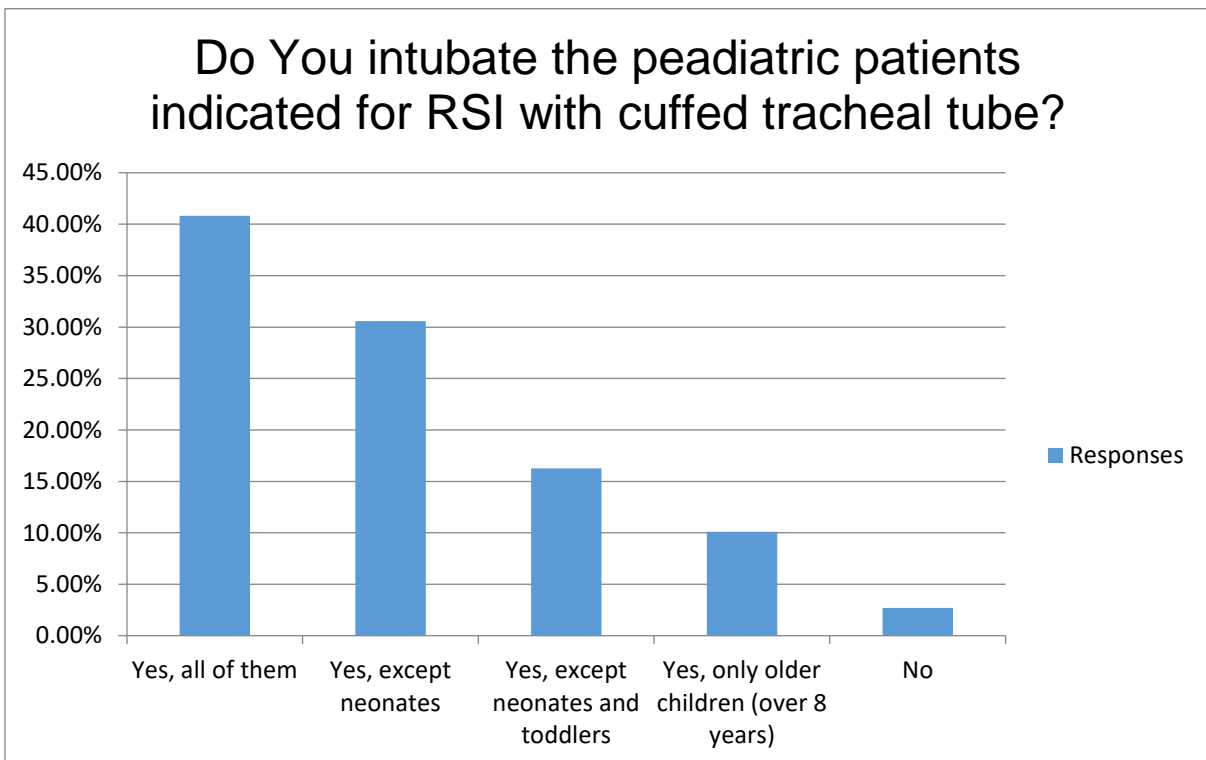

Supplement: ejanet-37-435-s001.pdf [file ejanet-37-435-s001.pdf]
